# Supplementary material for: Halide removal and SiO 2 @TiO 2 composite passivation: enhancing InP QD photooxidation stability for WLEDs
Source: Royal Society of Chemistry journal article supplement (doi:10.1039/d5ta09502f), 2026-01-01
Supplement: d5ta09502f1.pdf [file d5ta09502f1.pdf]

Electronic supplementary information

**Halide Removal and SiO<sub>2</sub>@TiO<sub>2</sub> Composite Passivation: Enhancing InP QD  
Photooxidation Stability for WLEDs**

Yuyuan Fu<sup>†, a</sup>, Yujie Song<sup>†, a</sup>, Qixin Weng<sup>a</sup>, Wenda Zhang<sup>\*, a</sup>, Changsheng Cao<sup>\*, b</sup>,  
Yujie Song<sup>\*, a</sup>

<sup>a</sup>*School of Chemistry and Chemical Engineering, Hainan University, Haikou 570228, China*

<sup>b</sup>*Key Laboratory of Advanced Carbon-Based Functional Materials (Fujian Province University),  
Fuzhou University, Fuzhou 350016, Fujian, China*

<sup>†</sup>*These authors contributed equally.*

\* Corresponding authors.

E-mail addresses:

songyujie@hainanu.edu.cn (Y. Song);

cscao@fzu.edu.cn (C. Cao);

zhangwenda@hainanu.edu.cn (W. Zhang)

## **Physical characterization**

**UV-Vis Absorption Spectroscopy.** The UV-Vis absorption spectra were measured using a Shimadzu UV-2600 spectrophotometer.

**Emission Spectroscopy.** The emission spectra were determined with a Tianjin Gangdong F-320 fluorescence spectrophotometer equipped with a 150 W xenon lamp.

**X-ray Diffraction (XRD).** XRD measurements were carried out using a Rigaku high-power variable-temperature X-ray diffractometer. The sample preparation procedure was as follows: A solution of QDs dissolved in hexane was dropped onto a dry silicon substrate. After allowing the hexane to completely evaporate by standing, the sample was ready for testing.

**X-ray Photoelectron Spectroscopy (XPS).** XPS measurements were performed using a Shimadzu KRATOS Axis Supra X-ray photoelectron spectrometer: A solution of QDs dissolved in hexane was dropped onto a dry silicon substrate and left to stand until the hexane had completely evaporated before testing.

**Transmission Electron Microscope (TEM).** TEM and EDS analyses were performed using a Thermo Scientific Talos F200X G2 microscope: The purified sample obtained from centrifugation was dispersed in hexane and drop-cast onto a copper grid for measurement.

**Photoluminescence Quantum Yield (PLQY).** PLQY was measured using the steady-state and transient fluorescence spectrometer (FLS1000, Edinburgh Instruments, UK). For the measurement, the etched InP QDs (without further centrifugation) were dispersed in hexane within a quartz cuvette, with the absorbance at the excitation wavelength (365 nm) precisely adjusted to 0.1. PLQY was then determined using the integrating sphere system.

**Stability Testing.** The stability of quantum dots (QDs) was tested by exposing them to UV light irradiation (wavelength: 365 nm) under the conditions of 60°C and 90% relative humidity.

## **Experimental**

### **Materials**

Indium(III) chloride ( $\text{InCl}_3$ , 99.99 %), zinc(II) chloride ( $\text{ZnCl}_2$ , 99.99 %), indium(III)

iodide ( $\text{InI}_3$ , 99.99 %), zinc acetate ( $\text{Zn}(\text{OAc})_2$ , 99.99%), zinc(II) bromide ( $\text{ZnBr}_2$ , 99.99 %), indium(III) acetate ( $\text{In}(\text{OAc})_3$ , 99.99 %), oleylamine (OLA, 90 %), palmitic acid, (90%), tris(dimethylamino)phosphine ( $(\text{DMA})_3\text{P}$ , 97 %), tris(trimethylsilyl)phosphine ( $(\text{TMS})_3\text{P}$ , 10 wt % in hexane), zinc acetate, palmitic acid, zinc stearate ( $\text{Zn}(\text{St})_2$ , 10-12% Zn), 1-octadecene (ODE, >90 %), tri-n-octylphosphine (TOP, 97 %), 1-dodecanethiol (DDT, 98 %), sulfur powder (S, 99.98 %), selenium powder (Se, 99.99 %), tetramethyl orthosilicate (TMOS, 98 %), tetrabutyl titanate (TBT, 98 %), toluene (TOL, 99 %), n-hexane, and ethanol were purchased from Sigma-Aldrich and used without further purification.

### **Stock Solutions**

$\text{Zn}(\text{St})_2$ -ODE:  $\text{Zn}(\text{St})_2$  (2.5 g) was dissolved in 10 mL of degassed ODE under magnetic stirring to afford a clear solution.

TOP-Se (1.9 M): Se powder (15.2 mmol) and TOP (8 mL) were heated to 100 °C in a 20 mL vial with stirring until a colorless, homogeneous solution formed.

TOP-S (2.2 M): S powder (17.5 mmol) and TOP (8 mL) were heated to 100 °C in a 20 mL vial with stirring until complete dissolution.

### **Synthesis of red-emitting InP/ZnSe/ZnS QDs (InP/ZnSe/ZnS QDs-with-Cl)**

$\text{InCl}_3$  (0.452 mmol) and  $\text{ZnCl}_2$  (2.2 mmol) were charged into a 50 mL three-neck flask with OLA (9 mL). The mixture was degassed at 120 °C for 1 h under vacuum to remove trace water and oxygen. Under nitrogen, the solution was heated to 190 °C, and  $(\text{DMA})_3\text{P}$  (2.42 mmol, 0.50 mL) was rapidly injected. The reaction was held at 190 °C for 21 min to grow InP cores. The temperature was then raised to 200 °C, and  $\text{Zn}(\text{St})_2$ -ODE solution (6 mL) together with TOP-Se (1.9 M, 0.8 mL) was added slowly. Subsequently, the temperature was increased to 300 °C; TOP-S (2.2 M, 0.4 mL) was injected and reacted for 5 min, followed by rapid addition of dodecanethiol (1.5 mL) and a final growth step at 300 °C for 40 min to complete the ZnS shell. The reaction mixture was cooled to room temperature prior to further processing.

### **Synthesis of green-emitting InP/ZnSe/ZnS QDs**

InI<sub>3</sub> (0.38 mmol, 0.168 g) and ZnBr<sub>2</sub> (2.2 mmol, 0.495 g) were loaded into a 50 mL three-neck flask together with OLA (5 mL). The mixture was degassed at 120 °C for 1 h to remove residual water and oxygen. Under a nitrogen atmosphere, the solution was heated to 200 °C, at which point (DMA)<sub>3</sub>P (2.3 mmol, 0.45 mL) was swiftly injected. The reaction was maintained at 200 °C for 21 min to nucleate InP cores. The temperature was then raised to 280 °C, and Zn(St)<sub>2</sub> solution (6 mL) together with TOP-Se (1.9 M, 0.6 mL) was added dropwise over 5 min; after 20 min at 280 °C, TOP-S (2.2 M, 0.4 mL) was introduced and the mixture was held at 300 °C for 20 min. Finally, dodecanethiol (1.5 mL) was rapidly injected and the reaction was kept at 300 °C for 40 min to complete the ZnS outer shell. The reaction mixture was allowed to cool to room temperature before work-up. The PLQY of the green-emitting InP/ZnSe/ZnS QDs was measured to be 82%.

### **Synthesis of halide-free InP/ZnSe/ZnS QDs (InP/ZnSe/ZnS QDs-free-Cl)**

In(OAc)<sub>3</sub> (0.15 mmol) and Zn(OAc)<sub>2</sub> (0.075 mmol) were loaded into a 50 mL three-neck flask together with OLA (5 mL). The mixture was degassed at 120 °C for 1 h under vacuum to remove residual water and oxygen. Under nitrogen, the solution was heated to 270 °C, at which point (DMA)<sub>3</sub>P (2.3 mmol, 0.45 mL) was swiftly injected. The reaction was maintained at 270 °C for 21 min to nucleate InP cores. The temperature was then raised to 280 °C, and Zn(St)<sub>2</sub> solution (6 mL) together with TOP-Se (1.9 M, 0.6 mL) was added dropwise, after 20 min at 280 °C, TOP-S (2.2 M, 0.4 mL) was introduced and the mixture was held at 300 °C for 20 min. Finally, dodecanethiol (1.5 mL) was rapidly injected and the reaction was kept at 300 °C for 40 min to complete the ZnS outer shell. The reaction mixture was allowed to cool to room temperature before work-up.

### **Purification of InP/ZnSe/ZnS QDs**

Crude InP/ZnSe/ZnS QDs were dispersed in n-hexane and centrifuged at 10,000 rpm for 2 min; the precipitate was discarded. The supernatant was mixed with ethanol to

induce flocculation, followed by centrifugation at 10,000 rpm for 2 min. The supernatant was removed and the cycle repeated three times to give purified QDs.

### Halide-removal treatment

The purified QDs were re-dispersed in a mixture of 70 mL OLA and 5 mL DDT in a 100 mL three-neck flask. The mixture was degassed at 120 °C for 1 h, then heated to 300 °C under N<sub>2</sub> and maintained for 30 min to desorb surface-bound halide ions.

### Synthesis of InP@SiO<sub>2</sub> QDs

The purified QDs were dissolved in toluene (0.5 mg mL<sup>-1</sup>). TMOS (100 µL) was added to 20 mL of this QD-toluene solution. The mixture was stirred at 100 rpm, 25 °C, 60-70 % RH for 6 h to complete hydrolysis/condensation.

### Synthesis of InP@SiO<sub>2</sub>@TiO<sub>2</sub> QDs

An identical QD-toluene solution (0.5 mg mL<sup>-1</sup>, 20 mL) was treated with TMOS (100 µL) under the same conditions for 3 h. TBT (100 µL) was then injected and stirring continued at 100 rpm, 25 °C, 60-70 % RH for 4 h to deposit the TiO<sub>2</sub> over-layer.

### WLED fabrication

Red and green InP@SiO<sub>2</sub>@TiO<sub>2</sub> QDs were dispersed in optical-grade silicone at a weight ratio of 1:10. The blend was drop-cast onto a 446 nm blue LED chip and cured under 365 nm UV irradiation for 1 min to yield the final white-light-emitting device.

**Table S1** PLQY and fluorescence lifetimes of the QDs samples in solution and film states.

|                                               | PLQY | fluorescence lifetime (ns) |
|-----------------------------------------------|------|----------------------------|
| QDs-free-Cl (solution)                        | 75%  | 58.08                      |
| QDs-with-Cl (solution)                        | 70%  | 55.30                      |
| QDs-Cl-desorbed (solution)                    | 67%  | 52.92                      |
| QDs (film)                                    | 30%  | 30.22                      |
| QDs@SiO <sub>2</sub> (film)                   | 25%  | 24.88                      |
| QDs@SiO <sub>2</sub> @TiO <sub>2</sub> (film) | 24%  | 22.55                      |

**Table S2** The surface Cl<sup>-</sup> content of QDs-Cl-desorbed and QDs-with-Cl

| Precursor                    | Cl     |
|------------------------------|--------|
| InP/ZnSe/ZnS QDs-Cl-desorbed | 4.45%  |
| InP/ZnSe/ZnS QDs-with-Cl     | 16.13% |

**Table S3** PLQY of the QDs samples across solvents with different polarities

|                 | n-hexane | toluene | chloroform |
|-----------------|----------|---------|------------|
| QDs-free-Cl     | 75%      | 73%     | 70%        |
| QDs-Cl-desorbed | 67%      | 65%     | 61%        |
| QDs-with-Cl     | 70%      | 68%     | 66%        |

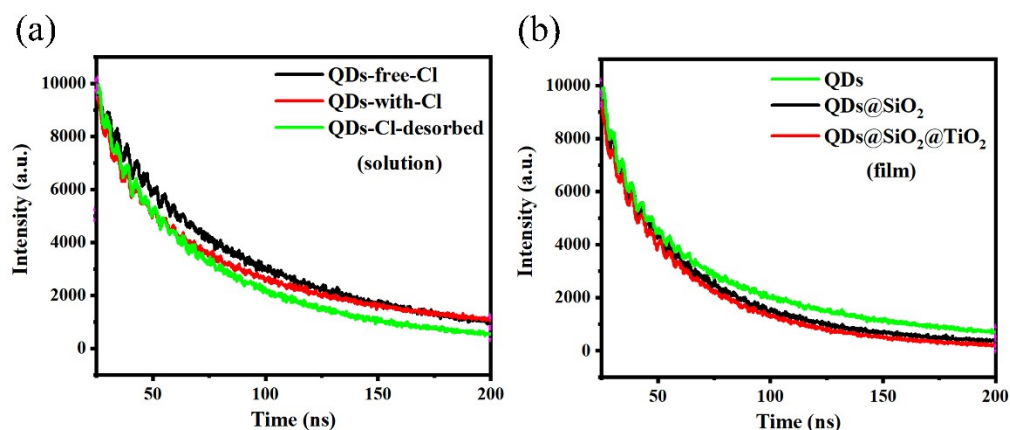**Fig. S1** Comparison of fluorescence lifetimes of (a) QDs solutions (QDs-free-Cl, QDs-Cl-desorbed, and QDs-with-Cl) and (b) QDs films (QDs, QDs@SiO<sub>2</sub>, and QDs@SiO<sub>2</sub>@TiO<sub>2</sub>).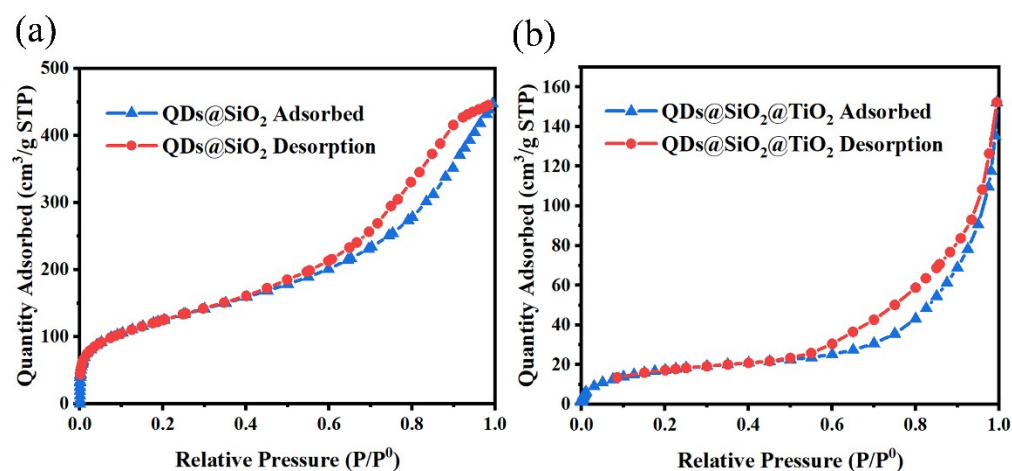**Fig. S2** BET adsorption curves of (a) QDs@SiO<sub>2</sub> and (b) QDs@SiO<sub>2</sub>@TiO<sub>2</sub>.

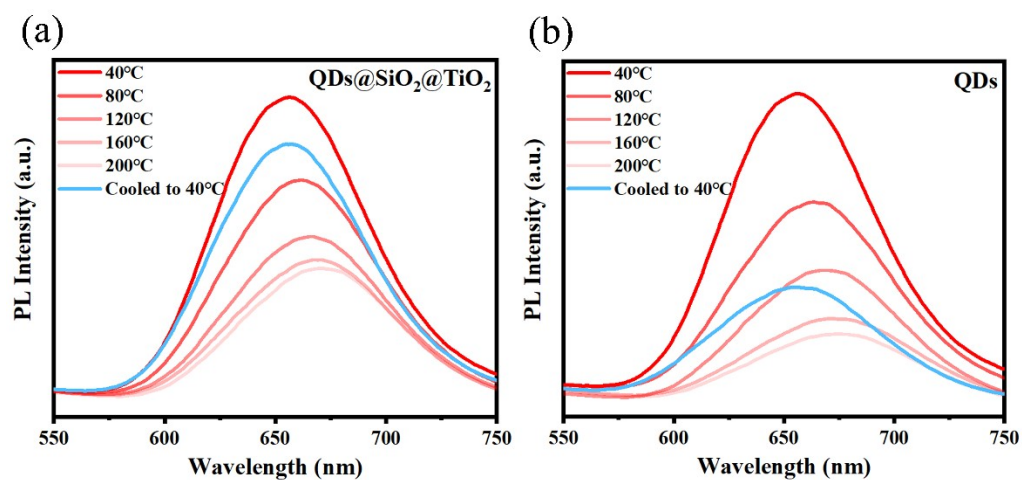

**Fig. S3** Temperature-dependent photoluminescence spectra of (a) QDs@SiO<sub>2</sub>@TiO<sub>2</sub> and (b) QDs.

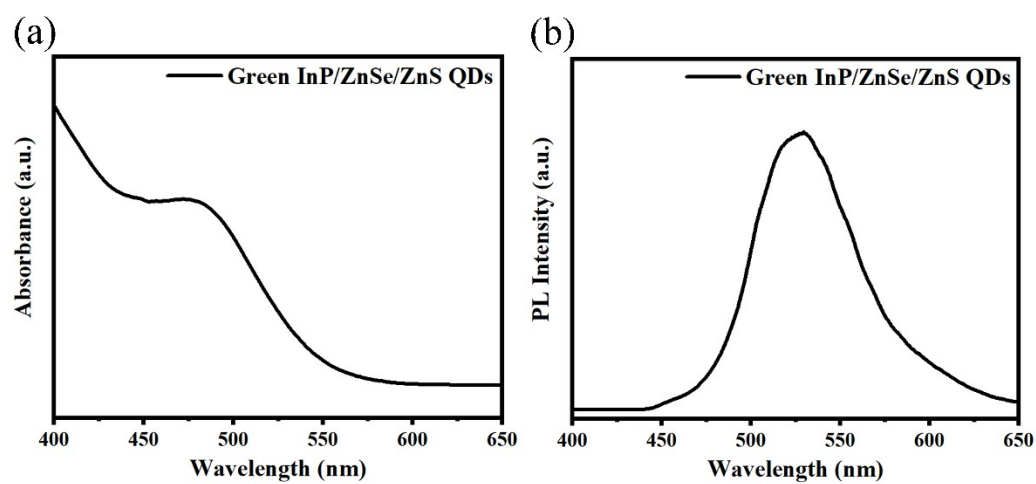

**Fig. S4** (a) UV-vis absorption spectrum and (b) PL spectrum of Green InP/ZnSe/ZnS QDs.
